# Supplementary material
Source: publisher site journal article supplement (doi:10.18632/aging.206385)
Supplement: Supplementary file 3 [file aging-v18i1-206385-supplementary-material-SD2.pdf]

## SUPPLEMENTARY TABLES

**Supplementary Table 1. List of primer sequences used in real-time PCR.**

| <b>Gene</b>   | <b>Forward primer 5'-3'</b> | <b>Reverse primer 5'-3'</b> |
|---------------|-----------------------------|-----------------------------|
| <i>18S</i>    | ACCGCAGCTAGGAATAATGGA       | GCCTCAGTTCCGAAAACCA         |
| <i>p21</i>    | TGGAGACTCTCAGGGTCGAAA       | GGCGTTTGGAGTGGTAGAAATC      |
| <i>p16</i>    | AGCTGTCGACTTCATGACAAG       | GAGCTTTGGTTCTGCCATTTG       |
| <i>LMNB1</i>  | AAGCAGCTGGAGTGGTTGTT        | TTGGATGCTCTTGGGGTTC         |
| <i>INHBA</i>  | TCTGCAGTAGTGTGGACTAGAA      | CCTGGGTAATTGGGTAGGAAAG      |
| <i>GDF15</i>  | CTACAATCCCATGGTGCTCAT       | TCATATGCAGTGGCAGTCTTT       |
| <i>PAI-1</i>  | CATTACTACGACATCCTGGAACTG    | AATGTTGGTGAGGGCAGAGAG       |
| <i>IGFBP7</i> | GGGTGCTGGTATCTCCTCTA        | TGTAAGGCATCAACCACTGTAA      |
| <i>FN1</i>    | CTGAGACCACCATCACCATTAG      | GATGGTTCTCTGGATTGGAGTC      |
| <i>CYR61</i>  | CAGGACTGTGAAGATGCGGT        | GCCTGTAGAAGGGAAAGGT         |
| <i>CTGF</i>   | AGGAGTGGGTGTGTGACGA         | CCAGGCAGTTGGCTCTAATC        |
| <i>ITGA2</i>  | CTGTTCAAGGAGGAGACAACCTT     | CTGCACCCAGCATCAGAATA        |
| <i>ITGA4</i>  | CCAGCAGAGAAGCTAACTGTAG      | CATGAGGACCAAGGTGGTAAG       |
| <i>ITGA5</i>  | GGTGGACCAGGAAGCTATTT        | GAACCAGGTTGATCAGGTACTC      |
| <i>ITGA6</i>  | CCAAGGTTCTGAGCCCAAATA       | GGGAATGGGACGCAGTTTAT        |
| <i>ITGA7</i>  | CCTTAGAGTGCTGTGAGATGAG      | GAATGGGAGAGGAAGGGATTAG      |
| <i>ITGA11</i> | CCTACAGCACGGTCCTAAATATC     | CTCCTCGTTCACACACTCAAT       |
| <i>ITGAV</i>  | ACTCTTAGCTGGTCTTCGTTTC      | TGTGAGATACAACCTGGGCTTAC     |
| <i>ITGB1</i>  | CCCAGAGGCTCCAAAGATATAAA     | GCTGTGGTTGGATCTGAGTAA       |
| <i>ITGB3</i>  | CATCCATAGCACCTCCACATAC      | CCAGCCAACCTCATGGGAATAA      |
| <i>ITGB5</i>  | CAGATGACACCACAGGAGATTG      | GTAGTACAGGTCCACAGGATAGT     |
| <i>ITGB8</i>  | GGCCAAGGTGAAGACAATAGA       | ATCCTCTTGAACACACCATCC       |
